# Supplementary material for: Racial and ethnic disparities in a real-world precision oncology data registry
Source: PubMed Central journal article supplement (PMC9852424; doi:10.1038/s41698-023-00351-6), 2023-01-19
Supplement: 41698_2023_351_MOESM2_ESM.pdf [file 41698_2023_351_MOESM2_ESM.pdf]

## **Racial and Ethnic Disparities in a Real-World Precision Oncology Data Registry**

Alexander TM Cheung MBHL\*<sup>1,2</sup>, Elina L. Palapattu\*<sup>2,3</sup>, Isabella R. Pompa BA<sup>4</sup>, Christopher M. Aldrighetti BS<sup>4</sup>, Andrzej Niemierko PhD<sup>4</sup>, Henning Willers MD<sup>4</sup>, Franklin Huang MD PhD<sup>5</sup>, Neha Vapiwala MD<sup>6</sup>, Eli Van Allen MD<sup>2,3</sup>, Sophia C. Kamran MD<sup>†2,4</sup>

\*co-first authors; †corresponding author

1. NYU Grossman School of Medicine, New York, NY
2. Broad Institute of Harvard and MIT, Cambridge, MA
3. Dana-Farber Cancer Institute, Boston, MA
4. Department of Radiation Oncology, Massachusetts General Hospital, Harvard Medical School, Boston, MA
5. Division of Hematology/Oncology, Department of Medicine, University of California, San Francisco, San Francisco, CA
6. Department of Radiation Oncology, Hospital of the University of Pennsylvania, Perelman School of Medicine, Philadelphia, PA

### **Table of contents**

- 1. Supplemental Tables.....Pg. 2-9**

**Supplemental Table 1 (ST1). Demographic Characteristics of Cancers in AACR GENIE: USA Sites Only**

| <b>Characteristic</b>         | <b>Thyroid</b> | <b>Melanoma</b> | <b>*NSCLC</b>   | <b>^SCLC</b>   | <b>Breast</b>   | <b>Esophageal</b> | <b>Stomach</b> | <b>Pancreatic</b> | <b>Colorectal</b> | <b>Anal</b>    | <b>Bladder</b>  | <b>#RCC</b>     | <b>Prostate</b> | <b>Ovarian</b>  | <b>Endometrial</b> | <b>Cervical</b> | <b>Vaginal</b> |
|-------------------------------|----------------|-----------------|-----------------|----------------|-----------------|-------------------|----------------|-------------------|-------------------|----------------|-----------------|-----------------|-----------------|-----------------|--------------------|-----------------|----------------|
| Total Number                  | 705            | 2799            | 11384           | 505            | 7907            | 1002              | 587            | 3056              | 8607              | 173            | 1686            | 1249            | 2879            | 1897            | 1674               | 166             | 75             |
| <i>Race (n%)</i>              |                |                 |                 |                |                 |                   |                |                   |                   |                |                 |                 |                 |                 |                    |                 |                |
| White                         | 561<br>(79.6%) | 2552<br>(91.2%) | 8798<br>(77.3%) | 422<br>(83.6%) | 6032<br>(76.3%) | 899<br>(88.7%)    | 398<br>(67.8%) | 2544<br>(83.2%)   | 6519<br>(75.7%)   | 156<br>(90.2%) | 1475<br>(87.5%) | 1027<br>(82.2%) | 2349<br>(81.6%) | 1577<br>(83.1%) | 1358<br>(81.1%)    | 113<br>(68.1%)  | 66<br>(88.0%)  |
| Black                         | 29<br>(4.1%)   | 16<br>(0.6%)    | 858<br>(7.5%)   | 14<br>(2.8%)   | 655<br>(8.3%)   | 19<br>(1.9%)      | 49<br>(8.3%)   | 153<br>(5.0%)     | 743<br>(8.6%)     | 10<br>(5.8%)   | 52<br>(3.1%)    | 56<br>(4.5%)    | 239<br>(8.3%)   | 68<br>(3.6%)    | 77<br>(4.6%)       | 14<br>(8.4%)    | 5<br>(6.7%)    |
| Asian+<br>Pacific<br>Islander | 72<br>(8.4%)   | 23<br>(0.8%)    | 771<br>(6.8%)   | 24<br>(4.8%)   | 433<br>(5.5%)   | 31<br>(3.1%)      | 7<br>(12.1%)   | 135<br>(4.4%)     | 477<br>(5.5%)     | 1<br>(0.6%)    | 42<br>(2.5%)    | 33<br>(2.6%)    | 85<br>(3.0%)    | 108<br>(5.7%)   | 89<br>(5.3%)       | 11<br>(6.6%)    | 1<br>(1.3%)    |
| Native<br>American            | 1<br>(0.1%)    | 2<br>(0.1%)     | 20<br>(0.2%)    | 1<br>(0.2%)    | 10<br>(0.1%)    | 3<br>(0.3%)       | 2<br>(0.3%)    | 6<br>(0.2%)       | 22<br>(0.2%)      | 0<br>(0%)      | 3<br>(0.2%)     | 1<br>(0.1%)     | 0<br>(0%)       | 2<br>(0.1%)     | 0<br>(0%)          | 0<br>(0%)       | 0<br>(0%)      |
| NA                            | 55<br>(7.8%)   | 206<br>(7.4%)   | 937<br>(8.2%)   | 44<br>(8.7%)   | 777<br>(9.8%)   | 60<br>(6.0%)      | 67<br>(11.4%)  | 218<br>(7.1%)     | 847<br>(9.7%)     | 6<br>(3.5%)    | 114<br>(6.8%)   | 132<br>(10.6%)  | 206<br>(7.2%)   | 142<br>(7.5%)   | 150<br>(9.0%)      | 28<br>(16.9%)   | 3<br>(4.0%)    |
| <i>Ethnicity (n%)</i>         |                |                 |                 |                |                 |                   |                |                   |                   |                |                 |                 |                 |                 |                    |                 |                |
| Hispanic                      | 44<br>(6.2%)   | 50<br>(1.8%)    | 351<br>(3.1%)   | 16<br>(3.2%)   | 448<br>(5.7%)   | 23<br>(2.3%)      | 63<br>(10.7%)  | 167<br>(5.5%)     | 477<br>(5.5%)     | 6<br>(3.5%)    | 44<br>(2.6%)    | 53<br>(4.2%)    | 108<br>(3.8%)   | 79<br>(4.2%)    | 85<br>(5.1%)       | 11<br>(6.6%)    | 3<br>(4.0%)    |
| Non-Hispanic                  | 622<br>(88.2%) | 2203<br>(78.7%) | 9796<br>(86.1%) | 452<br>(89.5%) | 6717<br>(85.0%) | 895<br>(89.3%)    | 473<br>(80.6%) | 2673<br>(87.5%)   | 6786<br>(78.8%)   | 148<br>(85.5%) | 1557<br>(92.3%) | 1102<br>(88.2%) | 2577<br>(89.5%) | 1699<br>(89.6%) | 1505<br>(89.9%)    | 131<br>(78.9%)  | 70<br>(93.3%)  |
| NA                            | 39<br>(5.5%)   | 546<br>(19.5%)  | 1237<br>(10.9%) | 37<br>(7.3%)   | 742<br>(9.4%)   | 84<br>(8.4%)      | 51<br>(8.7%)   | 216<br>(7.1%)     | 1344<br>(15.6%)   | 19<br>(11.0%)  | 85<br>(5.0%)    | 94<br>(7.5%)    | 194<br>(6.7%)   | 119<br>(6.3%)   | 84<br>(5.0%)       | 24<br>(14.5%)   | 2<br>(2.7%)    |

\*NSCLC= non-small cell lung cancer

^SCLC = small cell lung cancer

#RCC= renal cell carcinoma

**Supplemental Table 2 (ST2). Demographic Characteristics of Cancers in AACR GENIE: All Sites**

| Characteristic        | Thyroid        | Melanoma        | *NSCLC           | ^SCLC          | Breast          | Esophageal     | Stomach        | Pancreatic      | Colorectal      | Anal           | Bladder         | #RCC            | Prostate        | Ovarian         | Endometrial     | Cervical       | Vaginal       |
|-----------------------|----------------|-----------------|------------------|----------------|-----------------|----------------|----------------|-----------------|-----------------|----------------|-----------------|-----------------|-----------------|-----------------|-----------------|----------------|---------------|
| Total Number          | 771            | 3074            | 12351            | 519            | 10651           | 1071           | 625            | 3335            | 9576            | 191            | 1787            | 1317            | 3022            | 2338            | 1839            | 213            | 93            |
| <i>Race (n%)</i>      |                |                 |                  |                |                 |                |                |                 |                 |                |                 |                 |                 |                 |                 |                |               |
| White                 | 595<br>(77.2%) | 2672<br>(87%)   | 9223<br>(74.7%)  | 424<br>(81.7%) | 6348<br>(59.6%) | 919<br>(85.8%) | 417<br>(66.7%) | 2758<br>(82.7%) | 7050<br>(73.6%) | 163<br>(85.3%) | 1522<br>(85.2%) | 1063<br>(80.7%) | 2403<br>(79.5%) | 1897<br>(81.1%) | 1468<br>(79.8%) | 138<br>(64.8%) | 78<br>(83.9%) |
| Black                 | 32<br>(4.2%)   | 16<br>(0.5%)    | 873<br>(7.1%)    | 14<br>(2.7%)   | 661<br>(6.2%)   | 19<br>(1.8%)   | 49<br>(7.8%)   | 159<br>(4.8%)   | 758<br>(7.9%)   | 10<br>(5.2%)   | 53<br>(3.0%)    | 58<br>(4.4%)    | 243<br>(8%)     | 77<br>(3.3%)    | 82<br>(4.5%)    | 14<br>(6.6%)   | 6<br>(6.5%)   |
| Asian                 | 72<br>(9.3%)   | 24<br>(0.8%)    | 811<br>(6.6%)    | 26<br>(5%)     | 470<br>(4.4%)   | 33<br>(3.1%)   | 72<br>(11.5%)  | 148<br>(4.4%)   | 514<br>(5.4%)   | 2<br>(1%)      | 50<br>(2.8%)    | 34<br>(2.6%)    | 87<br>(2.88%)   | 159<br>(6.8%)   | 108<br>(5.9%)   | 14<br>(6.6%)   | 4<br>(4.3%)   |
| Pacific Islander      | 0<br>(0%)      | 0<br>(0%)       | 7<br>(0.06%)     | 0<br>(0%)      | 2<br>(0.02%)    | 0<br>(0%)      | 0<br>(0%)      | 0<br>(0%)       | 7<br>(0.07%)    | 0<br>(0%)      | 0<br>(0%)       | 0<br>(0%)       | 1<br>(0.03%)    | 3<br>(0.1%)     | 1<br>(0.05%)    | 0<br>(0%)      | 0<br>(0%)     |
| Native American       | 1<br>(0.1%)    | 2<br>(0.1%)     | 22<br>(0.2%)     | 1<br>(0.2%)    | 11<br>(0.1%)    | 3<br>(0.3%)    | 2<br>(0.3%)    | 7<br>(0.2%)     | 22<br>(0.23%)   | 0<br>(0%)      | 3<br>(0.2%)     | 1<br>(0%)       | 0<br>(0%)       | 2<br>(0.1%)     | 0<br>(0%)       | 1<br>(0.5%)    | 0<br>(0%)     |
| NA                    | 71<br>(9.2%)   | 360<br>(11.7%)  | 1415<br>(11.5%)  | 54<br>(10.4%)  | 3159<br>(29.7%) | 97<br>(9.1%)   | 85<br>(13.6%)  | 263<br>(7.9%)   | 1225<br>(12.8%) | 16<br>(8.4%)   | 159<br>(8.9%)   | 161<br>(12.2%)  | 288<br>(9.5%)   | 200<br>(8.6%)   | 180<br>(9.8%)   | 46<br>(21.6%)  | 5<br>(5.4%)   |
| <i>Ethnicity (n%)</i> |                |                 |                  |                |                 |                |                |                 |                 |                |                 |                 |                 |                 |                 |                |               |
| Hispanic              | 47<br>(6.1%)   | 90<br>(2.9%)    | 419<br>(3.4%)    | 18<br>(3.5%)   | 554<br>(5.2%)   | 35<br>(3.3%)   | 72<br>(11.5%)  | 307<br>(9.2%)   | 697<br>(7.3%)   | 9<br>(4.7%)    | 48<br>(2.7%)    | 70<br>(5.3%)    | 113<br>(3.7%)   | 119<br>(5.1%)   | 107<br>(5.8%)   | 13<br>(6.1%)   | 6<br>(6.5%)   |
| Non-Hispanic          | 622<br>(80.7%) | 2235<br>(72.7%) | 10097<br>(81.7%) | 453<br>(87.3%) | 6734<br>(63.2%) | 895<br>(83.7%) | 473<br>(75.7%) | 2699<br>(81%)   | 6870<br>(71.7%) | 148<br>(77.5%) | 1559<br>(87.2%) | 1105<br>(83.9%) | 2577<br>(85.3%) | 1700<br>(72.7%) | 1506<br>(81.9%) | 131<br>(61.5%) | 71<br>(76.3%) |
| NA                    | 102<br>(13.2%) | 749<br>(24.4%)  | 1835<br>(14.9%)  | 48<br>(9.2%)   | 3363<br>(31.6%) | 141<br>(13.2%) | 80<br>(12.8%)  | 329<br>(9.8%)   | 2009<br>(21%)   | 34<br>(17.8%)  | 180<br>(10.1%)  | 142<br>(10.8%)  | 332<br>(11%)    | 519<br>(22.2%)  | 226<br>(12.3%)  | 69<br>(32.4%)  | 16<br>(17.2%) |

\*NSCLC= non-small cell lung cancer

^SCLC = small cell lung cancer

#RCC= renal cell carcinoma

**Supplemental Table 3 (ST3). Observed/Expected Ratio of Samples by Cancer Type in AACR GENIE US-only institutions as compared to US Cancer Population**

|                             | <b>Observed/Expected ratio (95% CI)</b> |                                       |                   |                   |                        |
|-----------------------------|-----------------------------------------|---------------------------------------|-------------------|-------------------|------------------------|
|                             | <b>White</b>                            | <b>Asian + Pacific Islander (API)</b> | <b>Black</b>      | <b>Hispanic</b>   | <b>Native American</b> |
| <b>Colorectal</b>           | 1.02* (1.00-1.03)                       | 1.47* (1.20-1.79)                     | 0.78* (0.73-0.83) | 0.70* (0.65-0.75) | 0.35* (0.91-0.42)      |
| <b>Pancreatic</b>           | 1.08* (1.05-1.10)                       | 1.34 (0.96-1.87)                      | 0.43* (0.39-0.46) | 0.71* (0.62-0.81) | 0.40* (0.26-0.61)      |
| <b>Prostate</b>             | 1.09* (1.07-1.12)                       | 1.27 (0.85-1.89)                      | 0.54* (0.50-0.58) | 0.58* (0.51-0.66) | 0                      |
| <b>Lung</b>                 | 0.99 (0.98-1.00)                        | 2.43* (1.80-3.29)                     | 0.75* (0.70-0.79) | 0.77* (0.70-0.85) | 0.31* (0.26-0.36)      |
| <b>Breast</b>               | 1.02* (1.01-1.03)                       | 1.32* (1.10-1.59)                     | 0.78* (0.72-0.83) | 0.72* (0.66-0.78) | 0.24* (0.20-0.29)      |
| <b>Melanoma</b>             | 0.99 (0.99-1.00)                        | 3.29 (0.16-69.61)                     | 1.45 (0.44-4.84)  | 1.00 (0.68-1.48)  | 0.33* (0.15-0.72)      |
| <b>Ovarian</b>              | 1.06* (1.03-1.09)                       | 1.30 (0.91-1.86)                      | 0.40* (0.36-0.45) | 0.41* (0.37-0.45) | 0.17* (0.12-0.24)      |
| <b>Anal</b>                 | 1.08 (1.00-1.16)                        | 0.50 (0.04-7.10)                      | 0.56* (0.36-0.86) | 0.55 (0.30-1.00)  | 0                      |
| <b>Vaginal</b>              | 1.16 (0.99-1.35)                        | 0.50 (0.04-6.86)                      | 0.42* (0.26-0.67) | 0.43* (0.21-0.88) | 0                      |
| <b>Thyroid</b>              | 1.02 (0.98-1.07)                        | 1.31 (0.80-2.14)                      | 0.58* (0.45-0.75) | 0.46* (0.40-0.54) | 0.25* (0.08-0.74)      |
| <b>Cervical</b>             | 1.06 (0.93-1.20)                        | 1.57 (0.31-7.94)                      | 0.67 (0.43-1.04)  | 0.46* (0.33-0.64) | 0                      |
| <b>Endometrial</b>          | 1.25* (1.19-1.30)                       | 2.02 (0.99-4.14)                      | 0.20* (0.19-0.21) | 0.42* (0.38-0.47) | 0                      |
| <b>Bladder</b>              | 1.03* (1.01-1.05)                       | 1.27 (0.71-2.28)                      | 0.55* (0.46-0.66) | 0.58* (0.47-0.72) | 0.50 (0.20-1.25)       |
| <b>Stomach</b>              | 1.02 (0.95-1.09)                        | 1.82 (0.92-3.59)                      | 0.59* (0.49-0.72) | 0.77* (0.61-0.97) | 0.50 (0.14-1.81)       |
| <b>Esophagus</b>            | 1.07* (1.04-1.10)                       | 1.41 (0.65-3.08)                      | 0.23* (0.21-0.26) | 0.44* (0.36-0.55) | 0.60 (0.19-1.91)       |
| <b>Renal Cell Carcinoma</b> | 1.09* (1.06-1.13)                       | 1.10 (0.64-1.90)                      | 0.41* (0.37-0.62) | 0.42* (0.37-0.48) | 0.09* (0.06-0.13)      |
| <b>Overall</b>              | 1.06* (1.03-1.09)                       | 1.46* (1.27-1.67)                     | 0.50* (0.40-0.62) | 0.57* (0.50-0.65) | 0.28* (0.20-0.38)      |

\*p<0.05

**Supplemental Table 4 (ST4). Number of samples needed to detect differences in mutational proportions at 80% power in comparison to white patient samples at small effect size**

|                   | Current number of white samples in database (n) | Number (n) of samples needed for 80% power at a given effect size for p=0.05 significance level |        |       | Current number of non-white samples in database by race/ethnic group (n) |       |          |                  |                 |
|-------------------|-------------------------------------------------|-------------------------------------------------------------------------------------------------|--------|-------|--------------------------------------------------------------------------|-------|----------|------------------|-----------------|
|                   |                                                 | Cohen's h effect size                                                                           |        |       | Black                                                                    | Asian | Hispanic | Pacific Islander | Native American |
|                   |                                                 | h=0.1                                                                                           | h=0.15 | h=0.2 |                                                                          |       |          |                  |                 |
| <i>Primary</i>    |                                                 |                                                                                                 |        |       |                                                                          |       |          |                  |                 |
| NSCLC*            | 5898                                            | 906                                                                                             | 371    | 203   | 533                                                                      | 519   | 269      | 3                | 16              |
| Breast            | 3359                                            | 1025                                                                                            | 390    | 209   | 355                                                                      | 272   | 294      | 0                | 8               |
| Colorectal        | 4788                                            | 939                                                                                             | 377    | 205   | 508                                                                      | 383   | 479      | 7                | 17              |
| Pancreatic        | 1653                                            | 1495                                                                                            | 443    | 223   | 97                                                                       | 86    | 189      | 0                | 4               |
| Prostate          | 1545                                            | 1596                                                                                            | 451    | 225   | 156                                                                      | 49    | 73       | 0                | 0               |
| <i>Metastatic</i> |                                                 |                                                                                                 |        |       |                                                                          |       |          |                  |                 |
| NSCLC*            | 3622                                            | 1003                                                                                            | 387    | 208   | 367                                                                      | 351   | 168      | 4                | 7               |
| Breast            | 3157                                            | 1045                                                                                            | 393    | 210   | 322                                                                      | 213   | 274      | 2                | 3               |
| Colorectal        | 2389                                            | 1169                                                                                            | 409    | 214   | 258                                                                      | 144   | 229      | 0                | 5               |
| Pancreatic        | 1141                                            | 2515                                                                                            | 503    | 237   | 65                                                                       | 65    | 121      | 0                | 3               |
| Prostate          | 969                                             | 4131                                                                                            | 546    | 247   | 99                                                                       | 40    | 44       | 1                | 0               |

\*NSCLC= non-small cell lung cancer

**Supplemental Table 5 (ST5). OncoTree Codes for Each Cancer**

| <b>Cancer Type</b> | <b>OncoTree Code</b>                  |
|--------------------|---------------------------------------|
| Thyroid            | THPA                                  |
| Melanoma           | SKCM, MEL, MUP                        |
| *NSCLC             | NSCLC, LUAD, LUSC                     |
| ^SCLC              | SCLC                                  |
| Breast             | IDC, ILC, BRCA, MDLC, BRCNOS, BRCANOS |
| Esophageal         | ESCA, ESCC                            |
| Stomach            | STAD                                  |
| Pancreatic         | PAAD                                  |
| Colorectal         | COAD, COADREAD, READ                  |
| Anal               | ANSC                                  |
| Bladder            | BLCA                                  |
| #RCC               | CCRCC, RCC, PRCC, URCC, CHRCC         |
| Prostate           | PRAD                                  |
| Ovarian            | HGSOC, SOC                            |
| Endometrial        | UCEC, UEC                             |
| Cervical           | CESC                                  |
| Vaginal            | VSC                                   |

\*NSCLC= non-small cell lung cancer

^SCLC = small cell lung cancer

#RCC= renal cell carcinoma

**Supplemental Table 6 (ST6). AACR GENIE Participating Centers**

| <b>Abbreviation</b> | <b>Center</b>                                                                                                   |
|---------------------|-----------------------------------------------------------------------------------------------------------------|
| NKI*                | Netherlands Cancer Institute, on behalf of the Center for Personalized Cancer Treatment, Amsterdam, Netherlands |
| DFCI                | Dana-Farber Cancer Institute, Boston, MA, USA                                                                   |
| GRCC*               | Institut Gustave Roussy, Paris, France                                                                          |
| JHU                 | Johns Hopkins Sidney Kimmel Comprehensive Cancer Center, Baltimore, MD, USA                                     |
| MSK                 | Memorial Sloan Kettering Cancer Center, New York, NY, USA                                                       |
| UHN*                | Princess Margaret Cancer Centre, University Health Network, Toronto, Ontario, Canada                            |
| MDA                 | The University of Texas MD Anderson Cancer Center, Houston, TX, USA                                             |
| VICC                | Vanderbilt-Ingram Cancer Center, Nashville, TN, USA                                                             |
| CRUK*               | Cancer Research UK Cambridge Centre, University of Cambridge, Cambridge, England                                |
| CHOP                | Children’s Hospital of Philadelphia, Philadelphia, PA, USA                                                      |
| DUKE                | Duke Cancer Institute, Duke University Health System, Durham, NC, USA                                           |
| COLU                | The Herbert Irving Comprehensive Cancer Center, Columbia University, New York, NY, USA                          |
| SCI                 | Swedish Cancer Institute, Seattle, WA, USA                                                                      |
| UCSF                | University of California, San Francisco, CA, USA                                                                |
| VHIO*               | Vall d’Hebron Institute of Oncology, Barcelona, Spain                                                           |
| WAKE                | Wake Forest Baptist Medical Center, Wake Forest University Health Sciences, Winston-Salem, NC, USA              |
| YALE                | Yale Cancer Center, Yale University, New Haven, Connecticut, USA                                                |
| UCHI                | University of Chicago Comprehensive Cancer Center, Chicago, IL, USA                                             |

\*Non-USA institutions

**Supplemental Table 7 (ST7). Demographic Characteristics of Select Primary Cancers in AACR GENIE: All Sites**

| <b>Characteristic</b> | <b>*NSCLC</b> | <b>Breast</b> | <b>Colorectal</b> | <b>Pancreatic</b> | <b>Prostate</b> |
|-----------------------|---------------|---------------|-------------------|-------------------|-----------------|
| Total Number          | 7803          | 6658          | 6448              | 1981              | 1887            |
| <i>Race</i>           |               |               |                   |                   |                 |
| White                 | 5898          | 3359          | 4788              | 1653              | 1545            |
| Black                 | 533           | 355           | 508               | 97                | 156             |
| Asian                 | 519           | 272           | 383               | 86                | 49              |
| Pacific Islander      | 3             | 0             | 7                 | 0                 | 0               |
| Native American       | 16            | 8             | 17                | 4                 | 0               |
| NA                    | 834           | 2664          | 745               | 141               | 137             |
| <i>Ethnicity</i>      |               |               |                   |                   |                 |
| Hispanic              | 269           | 294           | 479               | 189               | 73              |
| Non-Hispanic          | 6438          | 3583          | 4730              | 1623              | 1642            |
| NA                    | 1096          | 2781          | 1239              | 169               | 172             |

\*NSCLC= non-small cell lung cancer



**Supplemental Table 8 (ST8). Demographic Characteristics of Select Metastatic Cancers in AACR GENIE: All Sites**

| <b>Characteristic</b> | <b>*NSCLC</b> | <b>Breast</b> | <b>Colorectal</b> | <b>Pancreatic</b> | <b>Prostate</b> |
|-----------------------|---------------|---------------|-------------------|-------------------|-----------------|
| Total Number          | 4956          | 4215          | 3289              | 1399              | 1272            |
| <i>Race</i>           |               |               |                   |                   |                 |
| White                 | 3622          | 3157          | 2389              | 1141              | 969             |
| Black                 | 367           | 322           | 258               | 65                | 99              |
| Asian                 | 351           | 213           | 144               | 65                | 40              |
| Pacific<br>Islander   | 4             | 2             | 0                 | 0                 | 1               |
| Native<br>American    | 7             | 3             | 5                 | 3                 | 0               |
| NA                    | 605           | 518           | 493               | 125               | 163             |
| <i>Ethnicity</i>      |               |               |                   |                   |                 |
| Hispanic              | 168           | 274           | 229               | 121               | 44              |
| Non-Hispanic          | 4022          | 3341          | 2271              | 1116              | 1060            |
| NA                    | 766           | 600           | 789               | 162               | 168             |

\*NSCLC= non-small cell lung cancer
